# Supplementary material
Source: bioRxiv or medRxiv preprint supplement (https://www.biorxiv.org/highwire/filestream/136394/field_highwire_adjunct_files/0/450536-1.pdf)
Supplement: Supplementary file [file 450536-1.pdf]

# Supplementary Figure 1

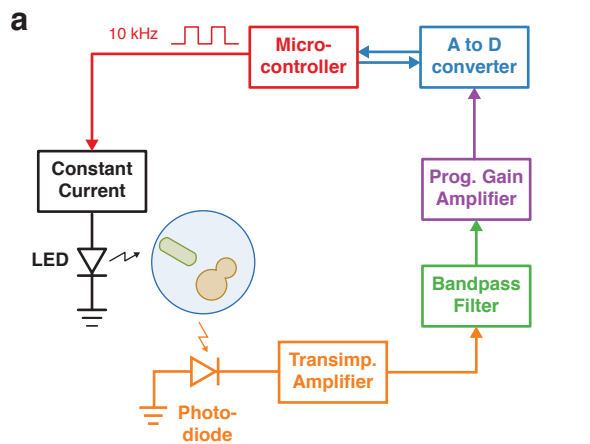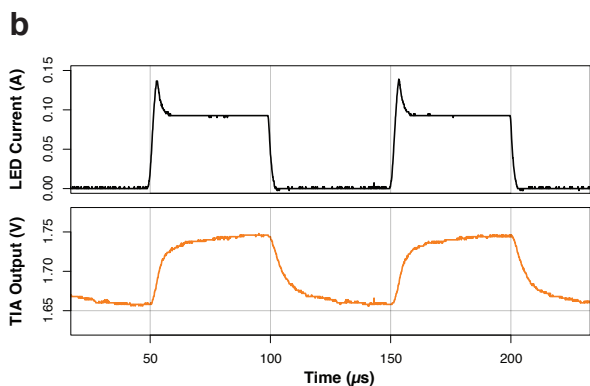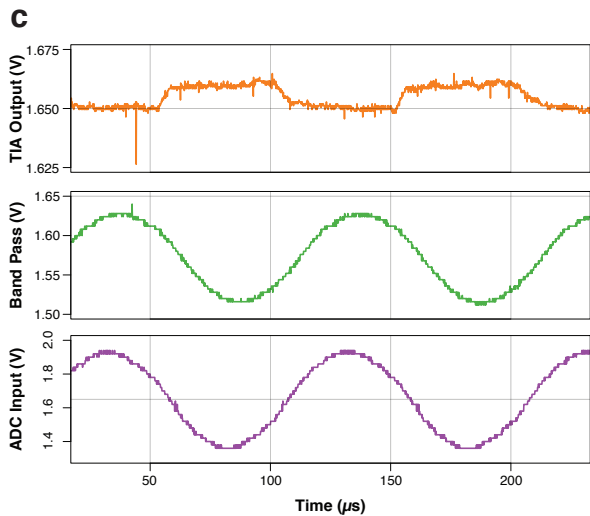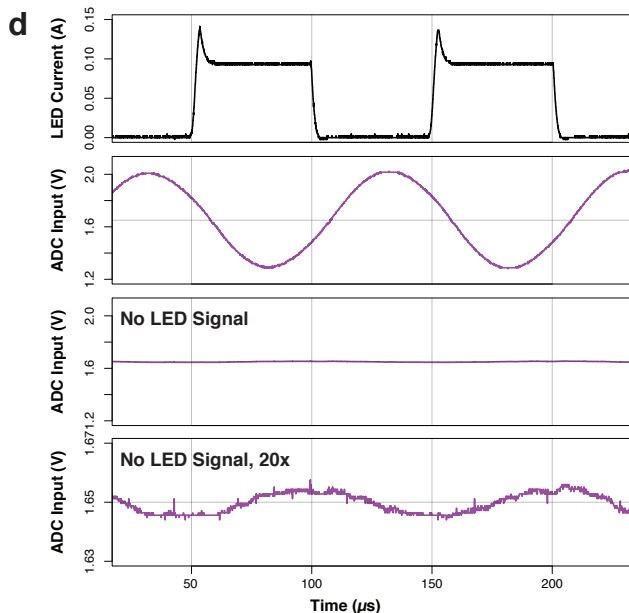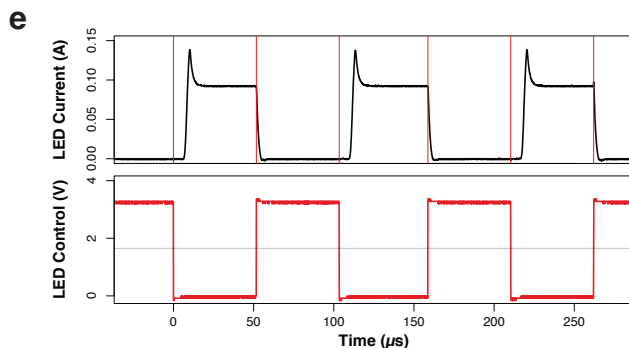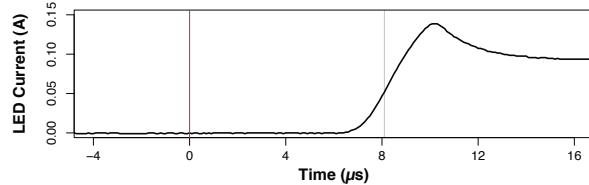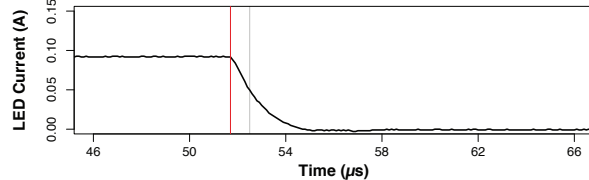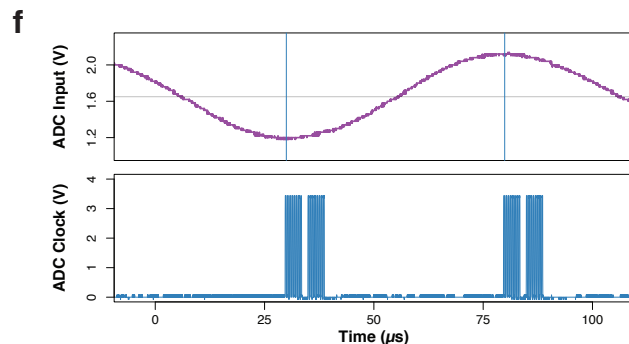

**Supplementary Figure 1. A synchronous detector that measures scattered light intensity against high ambient background.**

(a) Diagram of synchronous detector design. A microcontroller modulates LED illumination and measures the scattered light signal at an optimized phase relative to the LED.

Scattered light is detected by a photodiode and transimpedance amplifier (TIA), and this signal is filtered to extract the 10 kHz signal from ambient light and electronic noise. (b) Response of the photodiode/TIA to a 10 kHz square wave of strong illumination. The detector bandwidth of  $\sim 200$  kHz captures the illumination profile. Faint vertical lines indicate LED switching and faint horizontal lines indicate the 1.65V virtual ground.

(c) Filtering and amplification of weak illumination. The 10 kHz bandpass filter (BPF) extracts a sinusoidal signal with 10x inverted gain and the programmable gain amplifier (PGA) provides an additional 5x non-inverting gain. Faint vertical lines indicate LED switching and faint horizontal lines indicate the 1.65V virtual ground.

(d) Overall response of detector and filter to a 10 kHz square wave of weak illumination. When LED illumination is suppressed, a faint background signal can be observed in a different phase relative to the LED driver. This  $< 10$  mV signal reflects the noise floor of the detector.

Faint vertical lines indicate LED switching and faint horizontal lines indicate the 1.65V virtual ground. (e) The LED controller has an asymmetric switching delay. LED current switches on  $\sim 8$   $\mu$ s after the control signal activates, and switches off  $\sim 1$   $\mu$ s after the control signal deactivates. Vertical red lines indicate the times of control switching and faint vertical lines indicate the times of LED current switching. (f)

Acquisition timing tuned to the phase delay in the detector circuit. LED illumination was driven by a 10 kHz square wave with 50% duty cycle, accounting for the asymmetric switching described in (e), by activating the control at 0  $\mu$ s and inactivating it at 57  $\mu$ s. Data acquisition by the analog-to-digital converter (ADC) is triggered on the second falling edge of the clock signal provided by the microcontroller. Data was acquired at 30  $\mu$ s and 80  $\mu$ s, which align well with the trough and peak of the analog input signal, providing phase- and frequency-sensitive detection of true scattered light signal against asynchronous background.

## Supplementary Figure 2

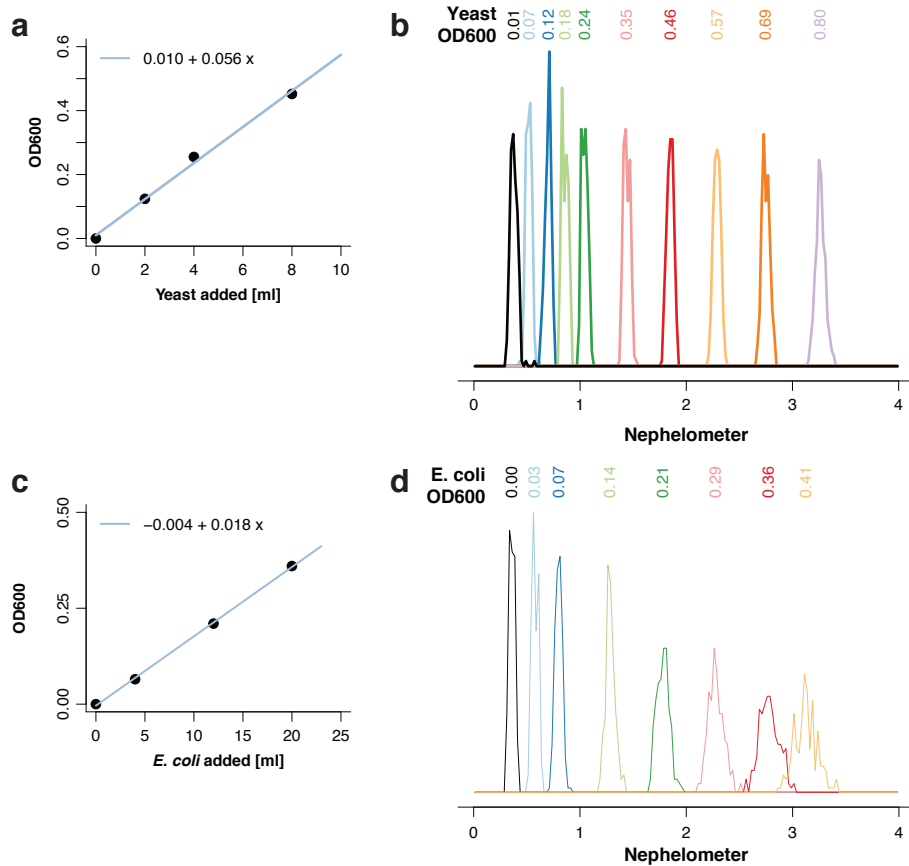

**Supplementary Figure 2. Calibration of cell density, absorbance, and turbidity measurements for yeast and bacteria.** (a) Budding yeast OD600 scales linearly with cell density. (b) Histogram of turbidity measurements at different yeast OD600 values. (c) *E. coli* OD600 scales linearly with cell density. (d) Histogram of turbidity measurements at different *E. coli* OD600 values.

### Supplementary Figure 3

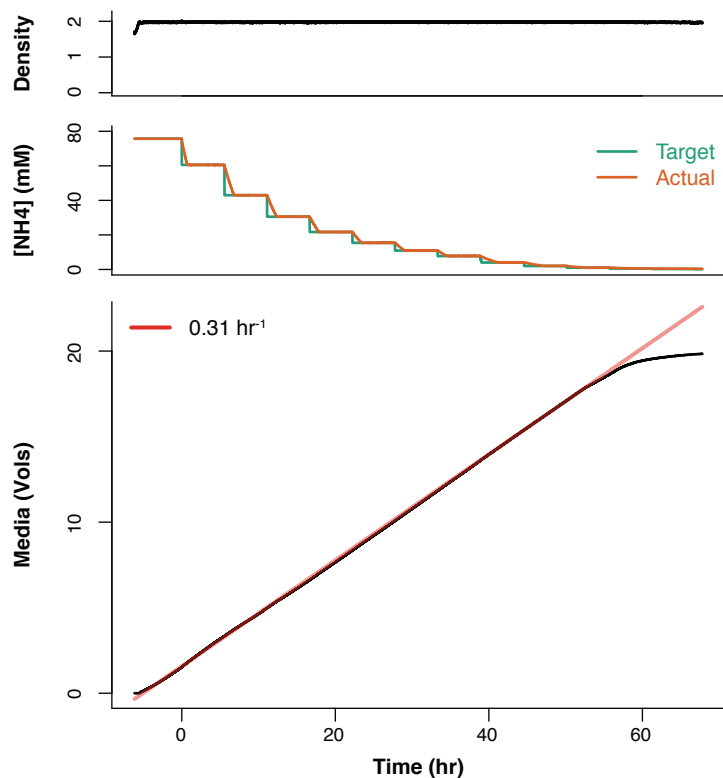

**Supplementary Figure 3. Growth of prototrophic S288c in media with progressively reduced nitrogen.** Cell density, growth medium composition, and cumulative media addition for a turbidostat culture with step-wise reduction in the ammonium composition. The dilution rate, and thus the growth rate, remains constant from the standard 76 mM [NH<sub>4</sub><sup>+</sup>] down below 4 mM [NH<sub>4</sub><sup>+</sup>], but growth ultimately stops at very low nitrogen levels.

Supplementary Figure 4

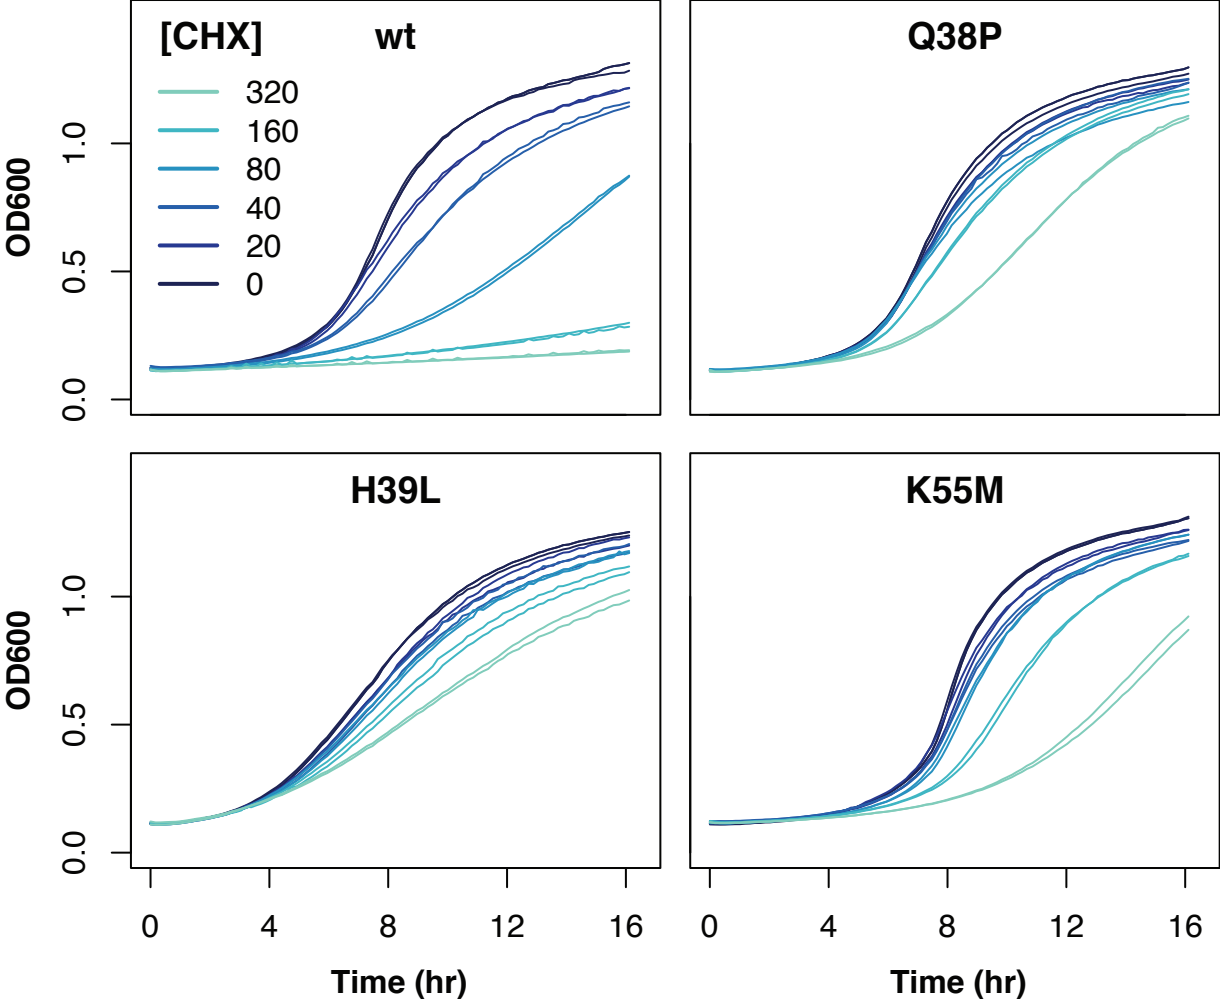

Supplementary Figure 4. Growth of *RPL28* variants in cycloheximide. Growth curves for individual cultures of NIY414 with *RPL28* variant plasmids are shown.

Table S1: Oligonucleotide sequences

| Name       | Purpose                               | Sequence                                                      |
|------------|---------------------------------------|---------------------------------------------------------------|
| NI-NI-38   | Fragment input library sequencing     | CAAGCAGAAGACGGCATAACGAGATCGTCAGGTGACTGGAGTTCAGACGTGTGCTCTTCCG |
| NI-AM-197  | Fragment recombinational cloning      | GAAGTAATTATCTACTTTTTACAACAAATTAATTTAAATGACACTCTTTCCCTACACGAC  |
| NI-AM-199  | Fragment recombinational cloning      | GTTTCTCAGCGCGACGCTCACGTCGTCGTGTTTGTGCGTCGTGACTGGAGTTCAGACGTG  |
| NI-AM-226  | Fragment selection library sequencing | GTTTGCAGCTTTCATTGAGCTTGTCTCTCAGC                              |
| NI-AM-227  | Fragment selection library sequencing | CGTCACACAACAAGGTCCTAGCGACG                                    |
| NI-AM-228  | Fragment selection library sequencing | AATGATACGGCGACCACCGAGATCTACACTCTTTCCTACACGACGCTCTTCCGATCT     |
| NI-NI-3    | Fragment selection library sequencing | CAAGCAGAAGACGGCATAACGAGATAGTCGTGACTGGAGTTCAGACGTGTGCTCTTCCG   |
| NI-NI-880  | Cloning RPL28(KpnI)                   | ACAGGCAAGCGATCCGTCGGATCCAAATATGCCACCGTTACC                    |
| NI-NI-881  | Cloning RPL28(KpnI)                   | TAATTGCGCTCTCTACAACCATTTGGTACCATACAGCGATAAATTAGTCTTCCATAATC   |
| NI-NI-882  | Cloning RPL28(KpnI)                   | GATTATGGAAGCACTAATTATCGCTGTATGGTACCAATGGTTGTAGAGAGCGCAATTA    |
| NI-NI-883  | Cloning RPL28(KpnI)                   | AATTCGCTTATTTAGAAGTGGCGCGCTTTTAAAAAAGCGATAAAAAGCGTTGG         |
| NI-NI-893  | Sequencing RPL28                      | ACCACACAGAAAATCCTGTGAT                                        |
| NI-NI-894  | Sequencing RPL28                      | AGGTTCAATCCACCTCGTCTCT                                        |
| NI-NI-895  | Sequencing RPL28                      | ACACCAGGGACCCACACATTAC                                        |
| NI-NI-896  | Sequencing RPL28                      | AGCTGATTGACATTTCTCTGTACC                                      |
| NI-NI-897  | Sequencing RPL28                      | ACTGTCTACTCATTTTACGGCT                                        |
| NI-NI-898  | Sequencing RPL28                      | TGGTCTCTTGTCTCTGGGA                                           |
| NI-NI-899  | Sequencing RPL28                      | GCTGCTGGTGGTGTGTGAAT                                          |
| NI-NI-900  | Sequencing RPL28                      | GGGACGAGGCAAGCTAAACAGA                                        |
| NI-NI-914  | Deleting RPL28                        | acacaagaataagtatgaggtagtttgctctcgaaaaaaccagctgaagcttcgtacgc   |
| NI-NI-915  | Deleting RPL28                        | CTATGTTTATATATGGATTTGAAAATCTTTTAAAAAagcatagggcactagtgatctg    |
| NI-NI-901  | Verifying rpl28Δ::KILEU2              | CTAACTCTACCCTGAGGTTGG                                         |
| NI-NI-905  | Verifying rpl28Δ::KILEU2              | tgccgccaatataatattaacacac                                     |
| NI-NI-908  | Verifying rpl28Δ::KILEU2              | CGCTAACTGATAAATTTGGGTGAGG                                     |
| NI-NI-912  | Verifying rpl28Δ::KILEU2              | CAGCGTTTGAATTTGACGAGTC                                        |
| NI-NI-954  | Cloning RPL28 exon 1-(Mfe/Nhe)        | agctagcACTTCTAAATAAGCGAATTTTC                                 |
| NI-NI-955  | Cloning RPL28 exon 1-(Mfe/Nhe)        | gtcaattgATACAGCGATAAATTAGTGC                                  |
| NI-NI-886  | Mutagenizing RPL28 exon 2             | GCACTAATTATCGCTGTATGGTACC                                     |
| NI-NI-913  | Mutagenizing RPL28 exon 2             | GCGATAAAAGCGTTGGGATC                                          |
| NI-NI-952  | Mutagenizing RPL28 exon 2             | ATACAATTGAAATGGTTGTAGAGAGCGC                                  |
| NI-NI-953  | Mutagenizing RPL28 exon 2             | TATGCTAGCACGACGCTCTTCCGATCTNNNNNNNNNNNNNNNGCGATAAAAGCGTTGGG   |
| NI-NI-956  | RPL28 barcode counting and genotyping | AATGATACGGCGACCACCGAGATCTACACTCTTTCCTACACGACGCTCTTCCGATC      |
| NI-NI-957  | RPL28 barcode genotyping              | CAAGCAGAAGACGGCATAACGAGATGTCCTCGTGGGCTCGG                     |
| NI-NI-958  | RPL28 barcode genotyping              | AGATCGCTCGTCGGCAGCGTC                                         |
| NI-NI-945  | RPL28 barcode counting                | GTGACTGGAGTTCAGACGTGTGCTCTTCCGATCTGATCCCAACGCTTTTATCGC        |
| NI-NI-798  | RPL28 barcode counting                | AATGATACGGCGACCACCGAGATCTACACTCTTTCCTACACGACGCTC              |
| NI-NI-799  | RPL28 barcode counting                | CAAGCAGAAGACGGCATAACGAGATCGTGATGTGACTGGAGTTCAGACGTGTG         |
| NI-NI-951  | RPL28 barcode counting                | CAAGCAGAAGACGGCATAACGAGATTACAAGGTGACTGGAGTTCAGACGTGTG         |
| NI-NI-999  | RPL28 barcode counting                | CAAGCAGAAGACGGCATAACGAGATTGTTGACTGTGACTGGAGTTCAGACGTGTG       |
| NI-NI-1000 | RPL28 barcode counting                | CAAGCAGAAGACGGCATAACGAGATACGGAAGTGTGACTGGAGTTCAGACGTGTG       |
| NI-NI-1001 | RPL28 barcode counting                | CAAGCAGAAGACGGCATAACGAGATTCTGACATGTGACTGGAGTTCAGACGTGTG       |
| NI-NI-1002 | RPL28 barcode counting                | CAAGCAGAAGACGGCATAACGAGATCGGGACGGGTGACTGGAGTTCAGACGTGTG       |
| NI-NI-1003 | RPL28 barcode counting                | CAAGCAGAAGACGGCATAACGAGATGTGCGGACGTGACTGGAGTTCAGACGTGTG       |
| NI-NI-1004 | RPL28 barcode counting                | CAAGCAGAAGACGGCATAACGAGATCGTTTACAGTGTGACTGGAGTTCAGACGTGTG     |
| NI-NI-1005 | RPL28 variant reconstruction          | GGAAAGCACTAATTATCGCTGTATcAATTGAAATGGTTGTAGAGAGCGC             |
| NI-NI-1006 | RPL28 variant reconstruction          | TAAGAAATTCGCTTATTTAGAAGTgctagcGCGATAAAAGCGTTGGGATC            |

| Name       | Purpose                      | Sequence                                  |
|------------|------------------------------|-------------------------------------------|
| NI-NI-1007 | RPL28 variant reconstruction | GGCCGGTGGTCcACATCACCACAGAATTAACATGG       |
| NI-NI-1008 | RPL28 variant reconstruction | TGTGGTGATGTgGACCACCGGCCATACC              |
| NI-NI-1009 | RPL28 variant reconstruction | TTATTTTCGGTAtGGTTGGTATGAGATACTCCACAAG     |
| NI-NI-1010 | RPL28 variant reconstruction | CATACCAACCATACCgAAATAACCTGGATGGT          |
| NI-NI-1011 | RPL28 variant reconstruction | CGGTGGTCAAttgCACCACAGAATTAACATGGATAAATACC |
| NI-NI-1012 | RPL28 variant reconstruction | TTCTGTGGTGcaaTTGACCACCGGCCATACC           |

**Supplementary Table 1. Oligonucleotide sequences.** Oligonucleotides used in this study are listed along with their sequence. A text version of data in this table is available at <https://github.com/ingolia-lab/turbidostat/tree/master/mcgeachy-2018/sequences>.



## Supplementary Table 2

| Plasmid            | Description                                  | Reference                    |
|--------------------|----------------------------------------------|------------------------------|
| pHLUM v2 (pNTI599) | ARS/CEN HIS3 LEU2 URA3 MET17                 | Müller et al., F1000Res 2016 |
| pNTI347            | pFA6a ARS/CEN P(PGK1)-(Ascl)-λN-T2A-SpHIS5   | (this study)                 |
| pNTI592            | pFA6a ARS/CEN RPL28 CaURA3                   | (this study)                 |
| pNTI619            | pFA6a ARS/CEN RPL28(exon I)-(Mfe/Nhe) SpHIS5 | (this study)                 |
| pNTI663            | pFA6a ARS/CEN RPL28 SpHIS5                   | (this study)                 |
| pNTI664            | pFA6a ARS/CEN RPL28(Q38P) SpHIS5             | (this study)                 |
| pNTI665            | pFA6a ARS/CEN RPL28(H39L) SpHIS5             | (this study)                 |
| pNTI666            | pFA6a ARS/CEN RPL28(K55M) SpHIS5             | (this study)                 |

**Supplementary Table 2. Plasmids.** Plasmids used in this study are listed. Annotated plasmid sequences in GenBank record format are available at <https://github.com/ingolia-lab/turbidostat/tree/master/mcgeachy-2018/sequences>. All plasmids are available from Addgene.

## Supplementary Table 3

| Strain          | Genotype                                     | Source       |
|-----------------|----------------------------------------------|--------------|
| BY4741 (NIY111) | S288c MATa his3Δ1 leu2Δ0 met15Δ0 ura3Δ0      | Invitrogen   |
| NIY414          | BY4741 rpl28Δ::KILEU2 pNTI592 (RPL28 CaURA3) | (this study) |

**Supplementary Table 3. Yeast strains.** Yeast strains used in this study are listed along with their genotype.
